# Supplementary material for: Sphingosine-1-Phosphate Receptor 3 Induces Endothelial Barrier Loss via ADAM10-Mediated Vascular Endothelial-Cadherin Cleavage
Source: MDPI journal article supplement (doi:10.3390/ijms242216083), 2023-11-08
Supplement: s1 [file s1]

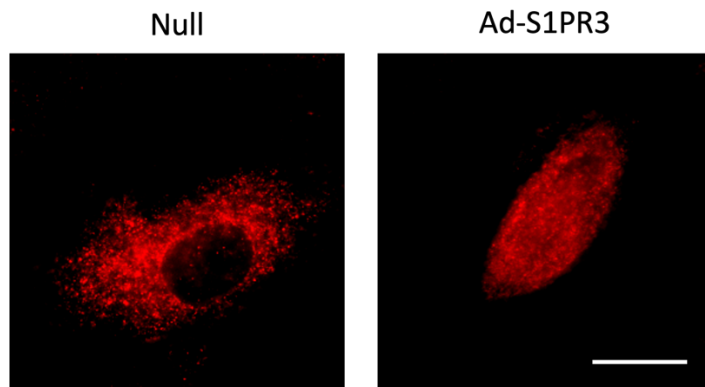

**Supplementary Figure S1.** Immunofluorescence images of p65 (red) in control (Ad-NULL) and S1PR3 OE cells. p65 translocate to the nucleus was observed in S1PR3 OE cells. (scale bar=20  $\mu\text{m}$ )
